1  
2  
3  
4  
5  
6  
7  
8  
9  
10  
11  
12  
13  
14  
15  
16  
17  
18  
19  
20  
21  
22

**Title: Killer meiotic drive and dynamic evolution of the *wtf* gene family**

**Authors:** Michael T. Eickbush<sup>1</sup>, Janet M. Young<sup>2</sup>, and Sarah E. Zanders<sup>\*1,3</sup>

**Affiliations:**

<sup>1</sup>Stowers Institute for Medical Research, Kansas City, MO 64110, USA.

<sup>2</sup>Division of Basic Sciences, Fred Hutchinson Cancer Research Center, Seattle, WA 98109, USA.

<sup>3</sup>Department of Molecular and Integrative Physiology, University of Kansas Medical Center, Kansas City, KS 66160, USA.

\*Correspondence to: Sarah E. Zanders, Stowers Institute for Medical Research, 1000 E 50<sup>th</sup> Street, Kansas City, Missouri 64110; sez@stowers.org; tel: (816) 926-4114

## 23 **Abstract**

24 Natural selection works best when the two alleles in a diploid organism are transmitted to  
25 offspring at equal frequencies. Despite this, selfish loci known as meiotic drivers that bias their  
26 own transmission into gametes are found throughout eukaryotes. Drive is thought to be a  
27 powerful evolutionary force, but empirical evolutionary analyses of drive systems are limited by  
28 low numbers of identified meiotic drive genes. Here, we analyze the evolution of the *wtf* gene  
29 family of *Schizosaccharomyces pombe* that contains both killer meiotic drive genes and  
30 suppressors of drive. We completed assemblies of all *wtf* genes for two *S. pombe* strains, as  
31 well as a subset of *wtf* genes from over 50 strains. We find that *wtf* copy number can vary  
32 greatly between strains, and that amino acid substitutions, expansions and contractions of DNA  
33 sequence repeats, and nonallelic gene conversion between family members all contribute to  
34 dynamic *wtf* gene evolution. This work demonstrates the power of meiotic drive to foster rapid  
35 evolution and identifies a recombination mechanism through which transposons can indirectly  
36 mobilize meiotic drivers.

37

## 38 **Introduction**

39 Many genes are maintained in eukaryotic genomes by natural selection because they provide a  
40 fitness benefit to the organisms that bear them. Analyses of these genes and their molecular  
41 functions constitute the bulk of molecular biology research performed today. However, not all  
42 genetic loci provide a fitness benefit to their hosts and some can even be described as  
43 parasites. There are many types of parasitic genes, which can comprise large fractions of  
44 eukaryotic genomes and can have a substantial impact on shaping genome evolution (1).

45

46 Killer meiotic drive loci are one such class of parasites that can be particularly harmful to fitness.  
47 These selfish loci act when heterozygous to destroy the meiotic products that do not inherit  
48 them. This killing causes the heterozygote to transmit the meiotic drive locus to up to 100% of  
49 the functional meiotic products (2, 3). Killer meiotic drivers have been observed throughout  
50 eukaryotes from plants to mammals, even though their selfish behavior generally decreases  
51 overall organismal fitness (3-6). Killer meiotic drivers can directly cause infertility, and biasing  
52 allele transmission disrupts the ability of natural selection to choose the best adapted alleles at  
53 any linked loci. Genomic loci that suppress drive are therefore predicted to be favored by  
54 selection (7). Indeed, the activity of many suppressors of meiotic drive has been observed,  
55 although only four suppressor genes have been cloned (8-11).

56

57 Detecting meiotic drive and distinguishing it from other phenomena that bias allele transmission  
58 can be experimentally challenging, even in the most tractable genetic systems (1). After  
59 establishing the presence of drive loci, identifying the genes responsible often takes years. In  
60 addition, the handful of meiotic drive loci that have been cloned in different systems are not  
61 homologous to each other, so sequence analysis is generally not useful in identifying novel  
62 drivers (3-6, 12-19). These factors limit the field's ability to efficiently analyze the possible  
63 presence or impact of meiotic drivers, especially in complex organisms with limited genetic  
64 tractability like humans.

65

66 Although meiotic drive genes generally do not share DNA sequence homology, they may share  
67 certain evolutionary signatures that could guide discovery of novel drive loci from genomic  
68 sequence data alone. For example, genetic conflict between drivers and suppressors is  
69 predicted to trigger an evolutionary arms race where both sides exhibit rapid evolution (19, 20).  
70 Similarly, evidence of analogous evolutionary arms races between viruses and host genomes  
71 has become widespread and has led to revolutionary insights in viral-host interactions (21).  
72 However, due to the paucity of cloned meiotic drivers and suppressors, studies of the  
73 evolutionary signatures of genes known to cause or suppress meiotic drive are limited (2).

74

75 The *wtf* gene family from *Schizosaccharomyces pombe* offers an exceptional opportunity to  
76 study the evolution of meiotic drive systems (22). The genomes of *S. pombe* isolates contain  
77 more than 20 *wtf* genes, some of which are known to be killer meiotic drivers (23, 24). The  
78 characterized drive genes are predicted to encode transmembrane proteins, but there are no  
79 obvious orthologs outside of *S. pombe* and the complete molecular mechanisms of drive are  
80 unknown. However, the characterized driving *wtf* genes use alternate transcripts to generate  
81 both an antidote and a poison during gametogenesis. The poison acts on all gametes, whereas  
82 the antidote remains within *wtf+* gametes. The combined action of the poison and antidote  
83 proteins results in the preferential death of the *wtf-* gametes generated by *wtf+/wtf-*  
84 heterozygotes and therefore preferential transmission of *wtf+* alleles (23, 24).

85

86 The driving *wtf* genes impose significant fertility costs on their hosts and severely limit the ability  
87 of *S. pombe* isolates to reproduce sexually (24, 25). Novel genes or genetic variants that can  
88 suppress the action of *wtf* drivers are expected to promote fitness and should be favored by  
89 natural selection (7). Consistent with this idea, a suppressor of a killer *wtf* drive gene has

90 recently been identified. Interestingly, this suppressor, *wtf18-2*, is a member of the *wtf* family  
91 and likely evolved from a *wtf* driver (11).

92

93 In this work, we assemble and annotate the *wtf* genes from two *S. pombe* isolates and compare  
94 them to the *wtf* genes of two previously published *S. pombe* isolates (24, 26). We classify the  
95 *wtf* genes into possible functional groups based on previously characterized genes. In addition,  
96 we greatly extend previous evolutionary analyses of the *wtf* gene family (24, 27). Consistent  
97 with their engagement in molecular arms races, we show that *wtf* genes exhibit rapid evolution.  
98 In fact, *wtf* genes are among the most rapidly-evolving genes in the *S. pombe* species group.  
99 We show that intact *wtf* gene numbers vary between isolates and that the sequences of  
100 syntenic *wtf* genes can be markedly different (<30% sequence identity), much lower than the  
101 high overall DNA sequence identity between genomes (>99%). We show that homologous  
102 recombination, repeat expansion and contraction, and positive selection for amino acid  
103 substitutions all contribute to diversification of the *wtf* gene family. This work provides a case  
104 study for the evolutionary dynamics between selfish genes and their suppressors and supports  
105 the idea that signatures of rapid evolution could guide the discovery of novel drive loci.

106

## 107 **Results**

### 108 **Correcting *wtf* gene annotations in the *Sp* reference strain**

109 The PomBase database provides annotated gene structures for 25 *wtf* genes, of which 3 are  
110 annotated as pseudogenes (28, 29). However, our previous analyses of the *Sp wtf4*, *Sp wtf13*  
111 and *Sp wtf18* loci revealed that the annotated splice sites were inconsistent with published long  
112 read RNA sequence data (11, 23). We therefore reevaluated the remaining *Sp wtf* gene  
113 annotations using long read RNA sequence data (Supplemental Figure 1) (30). We found our  
114 predictions were consistent with the PomBase annotations for 14 *wtf* genes but different for the  
115 remaining 11 genes. Our results matched those of Hu et al. who predicted the coding  
116 sequences computationally (24). In the updated annotations, four *wtf* genes that were previously  
117 predicted to be intact (*Sp wtf6*, *wtf8*, *wtf12* and *wtf17*) are truncated by early stop codons (based  
118 on homology to other *wtf* genes). These genes join *wtf1*, *wtf2*, and *wtf3* as likely pseudogenes.

119

### 120 ***wtf* gene numbers vary greatly between *S. pombe* species group isolates**

121 The molecular arms race model predicts that genes in conflict, such as meiotic drivers and their  
122 suppressors, will evolve rapidly in order to outcompete one another (20). Gene duplication is a  
123 commonly used evolutionary strategy to facilitate rapid diversification and has been observed in

124 the context of virus-host arms races (21). The large number of *wtf* loci in the reference *S.*  
125 *pombe* genome assembly (25 genes, including pseudogenes) is consistent with a similar  
126 scenario occurring within the *wtf* family. In addition, previous limited analyses revealed differing  
127 numbers of *wtf* genes between different *S. pombe* group isolates (23, 24). To more globally test  
128 the possibility that recent *wtf* gene duplications or deletions have occurred in the *S. pombe*  
129 group, we first determined whether *wtf* gene numbers are dynamic between strains.

130  
131 In addition to the reference *S. pombe* strain (972, isolated in France in 1921), over 150  
132 genomes of *S. pombe* isolates have been sequenced using paired-end 100 base pair Illumina  
133 reads with standard insert sizes (~300 base pairs) (31-33). In addition, the genome of the  
134 CBS5557 strain (collected in Spain, reported 1964) was also analyzed using long-read PacBio  
135 sequencing (24). Due to the repetitive nature of the *wtf* genes and the fact that they are often  
136 flanked by repetitive Tf transposons or Tf long terminal repeats (LTRs), the sequences of *wtf*  
137 loci could be reliably determined in CBS5557 using long reads, but not in genomes where only  
138 short reads were available. To overcome this challenge, we sequenced five *S. pombe* isolates  
139 and the reference strain using 'mate-pair' libraries to capture pairs of 150 bp reads separated by  
140 5-8 kb in the genome (Supplemental Figure 2). We obtained >80X coverage of each genome.  
141 With this large insert sequencing approach, the distance between mate pair reads is large  
142 enough that when one read of the pair falls within a repetitive *wtf*, the mate often falls in unique  
143 genomic sequence (Figure 1A). This allowed us to match *wtf* reads with their cognate genomic  
144 locus, even for *wtf* genes that share very high sequence identity. We sequenced derivatives of  
145 the *S. pombe* reference strain (which we will abbreviate as *Sp*), FY28974 (collected in Brazil in  
146 1996), FY28989 (collected in Africa in 1921), FY29030 (collected in Indonesia in 1949),  
147 FY29033 (collected in Indonesia in 1923), and *Schizosaccharomyces kambucha* (abbreviated  
148 *Sk*, isolated in the USA, reported in 2002) (26, 33, 34). *Sk* was historically given a different  
149 species name because it is reproductively isolated from *Sp*, but it is no more diverged from *Sp*  
150 than other isolates of the *S. pombe* group (25, 34, 35). Like all isolates classified as *S. pombe*,  
151 all strains analyzed in this work are all very closely related: they are estimated to have diverged  
152 from each other within the last ~2,300 years and share on average >99% DNA sequence  
153 identity (32).

154  
155 To identify genomic loci in each strain that harbor *wtf* genes, we first used our sequence data to  
156 select all read pairs in which one of the reads aligned to one or more of the 25 *wtf* genes in the  
157 reference genome (abbreviated as *Sp* here). We then isolated mates of those *wtf* reads, aligned

158 them to the *Sp* reference genome, and visually analyzed regions where multiple *wtf* mate reads  
159 mapped ('pileups'). This yielded a map in which each *wtf* locus is flanked by pileups of mate  
160 reads that map uniquely in the genome (Figure 1A and 1B). To verify this approach, we applied  
161 it to the *Sp* data and accurately detected all *wtf* locations. We further observed that *Sp* loci  
162 containing a single *wtf* gene were typically flanked by ~ 2.2 kb wide pileups, slightly wider than  
163 the typical genomic width of a *wtf* gene (average 1.2 kb). *Sp* loci encoding two *wtf* genes were  
164 flanked by wider (~4.4 kb) pileups (Figure 1B, Supplemental Figure 3). These data suggested  
165 we could use the presence and width of such pileups to identify *wtf* loci genome-wide.

166

167 We then used this approach to identify *wtf* loci in each of the five strains we sequenced and to  
168 estimate how many *wtf* genes each locus contains (Fig 1C). In *Sk* and FY29033, these  
169 estimates were confirmed (and in a few cases corrected) by assembly of the *wtf* loci from the  
170 mate-pair reads (see below) and by Sanger sequencing of some *Sk* loci (*wtf7*, *wtf9*, *wtf13*,  
171 *wtf14+wtf15*, *wtf17+18*, *wtf33*, *wtf19+20*, *wtf23*, *wtf27*, and *wtf35*). Unlike in *Sp*, in each of the  
172 other strains we found a few loci flanked by even wider pileups (up to ~7.5 kb), suggesting that  
173 these loci each contain three *wtf* genes (Supplemental Figure 3). This inference was confirmed  
174 by assembling 4 such sites.

175

176 At most of the loci we detected, we observed a symmetrical pair of pileups that were ~2.2 or  
177 ~4.4 kb wide that clearly suggested one or two *wtf* genes within the locus. Some loci, including  
178 most of those with three *wtf* genes, showed more complicated or misleading patterns (examples  
179 are shown in Supplemental Figure 4). Assembly of these regions in *Sk* and FY29033 revealed  
180 these inconsistencies were due to transposon insertions near the *wtf* loci that were not present  
181 in the reference genome. For example, a transposon insertion meant that the two genes at the  
182 *wtf2* locus in *Sk* showed a pileup pattern typical of a one gene locus, and an additional  
183 transposon meant that the three genes at the *wtf10* locus in *Sk* showed a pileup pattern typical  
184 of a two gene locus (Supplemental Figure 4). The errors in our FY29033 and *Sk* gene number  
185 predictions (at 3 out of 46 sites) were detected during the assembly of those loci to obtain *wtf*  
186 gene sequences (below). As we did not assemble all *wtf* loci in FY28974, FY28989 and  
187 FY29030, there could be similar uncorrected underestimates of *wtf* gene numbers in those  
188 strains. In addition, our method would be unable to detect more than three tandem *wtf* genes  
189 because the locus size exceeds the insert size between our mate-pair reads (Supplemental  
190 Figure 2). Although we did not observe loci with more than three tandem *wtf* genes in genomes

191 with assembled *wtf* loci, this limitation could also lead to an underestimate of *wtf* gene numbers  
192 in the genomes where we did not perform *de novo* assemblies.

193

194 Our mate-pair pileup approach could also miss additional *wtf* gene copies if they were found  
195 within larger recently duplicated regions of the genome. To look for such *wtf* genes, we aligned  
196 all sequence reads for each strain to the *Sp* reference genome and looked for regions  
197 containing *wtf* loci where sequencing coverage was roughly twice as high as the rest of the  
198 genome. We found two duplicated regions that include a *wtf* gene (Supplemental Figure 5). In  
199 FY29030, there is a ~14 kb duplication of the *wtf23* region (between chromosome 3 reference  
200 genome positions 2,145,417 and 2,159,329). In FY28989, there is a ~95 kb duplication of the  
201 *wtf33* region between positions 1,838,980 and 1,933,773 on chromosome 3 (Supplemental  
202 Figure 5). These duplications both appear to be very young, as we do not detect increased  
203 sequence variation in those regions compared to the flanking sequence. We therefore conclude  
204 that FY29030 contains two nearly identical copies of *wtf23* and FY28989 contains two nearly  
205 identical copies of *wtf33* (indicated with asterisks in Figure 1C).

206

207 After identifying all the genomic loci encoding *wtf* genes in the five strains, we combined our  
208 data with the previously identified *wtf* landscapes in CBS5557 and *Sp* (24, 29). Altogether, we  
209 found that the total number of *wtf* genes (including pseudogenes) varied greatly between  
210 strains, ranging from 25 in *Sp* to 38 in FY29033 (Figure 1C). Each locus can contain between  
211 zero and three *wtf* genes. Overall, the locations of *wtf* genes were quite similar between  
212 isolates: we found only four *wtf* loci that were not shared among all strains. Most of the variation  
213 in *wtf* number between strains can be explained by expansion/contraction of *wtf* gene numbers  
214 within each locus (Figure 1C), although without a clear outgroup strain it is unclear what the  
215 relative contributions of duplications and deletions are. Given that all strains encode at least one  
216 *wtf* gene at 20 shared loci, it is likely that the ancestral genome of these strains contained at  
217 least 20 *wtf* genes.

218

### 219 **Assembling *wtf* genes from *Sk* and FY29033 yields many unique gene sequences**

220 Within *Sp*, there is extensive sequence diversity amongst the *wtf* genes. Some, like *Sp wtf4* and  
221 *Sp wtf13*, are very similar (>90% amino acid identity), whereas others, like *Sp wtf4* and *Sp wtf7*,  
222 are not (<30% amino acid identity). We wanted to know if the gene repertoire of *Sp* reflects the  
223 full range of *wtf* diversity, or if it instead represents a limited sample. To test this, we used our  
224 sequencing data to assemble all *wtf* genes from two additional genomes, *Sk* and FY29033. We

225 assembled each *wtf* locus separately, first selecting all read pairs in which one of the reads  
226 aligned to a unique *wtf*-flanking region (i.e. the pileup regions discussed above, Figures 1A, 1B  
227 and 1D). We then assembled those read pairs to generate a contig with the *wtf* gene(s) in the  
228 center (Figure 1D).

229

230 To validate this approach, we also used it to assemble *Sk wtf* genes we had previously Sanger  
231 sequenced (23). We found that our assembly matched the Sanger sequencing in most cases,  
232 but differed at the *Sk wtf2* locus. Further analyses revealed that our new assembly of the *Sk*  
233 *wtf2* region was correct and the Sanger sequencing missed a Tf transposon and a second *wtf*  
234 gene (*wtf34*) in the region, likely due to template switching during PCR amplification. These  
235 results suggest our assembly approach is robust.

236

237 We then predicted *wtf* coding sequences based on possible open reading frames and homology  
238 to annotated *Sp wtf* genes. Our analyses (discussed below) found additional *wtf* gene variation  
239 not represented in the *wtf* genes found in *Sp* or CBS5557.

240

#### 241 **Naming *wtf* genes**

242 There are currently three reported phenotypic classes of intact *wtf* genes: killer meiotic drivers,  
243 suppressors of drive, and one essential gene (*Sp wtf21*) (11, 23, 24, 36). It is unknown if there  
244 are other phenotypic classes of *wtf* genes, but it would not be surprising given their vast  
245 diversity. To facilitate answering this question and to guide future phenotypic classification of *wtf*  
246 genes, we assigned gene names to each *wtf* gene from *Sk*, FY29033, and CBS5557.

247

248 For *Sp*, we used existing gene names, and for each other genome, we named genes according  
249 to their genomic synteny by comparison with *Sp*. We use *Sk* as an example to explain our  
250 naming scheme. At the loci where both *Sk* and *Sp* have one *wtf* gene, we gave the *Sk* gene the  
251 same number as *Sp* (e.g., *Sk wtf1*), regardless of sequence identity. For loci where *Sp* has one  
252 gene and *Sk* has two genes (e.g., at the *Sp wtf8* locus), we gave the same gene number to the  
253 *Sk* gene that was most similar to the *Sp* gene and gave the remaining *Sk wtf* genes increasing  
254 numbers (26-35) depending on their order in the *Sk* genome. We followed the same convention  
255 for naming the FY29033 and CBS5557 *wtf* genes to facilitate comparisons between strains (the  
256 genes of CBS5557 were already named by Hu et al. (24) as *cw1-cw29*; we provide name  
257 translations in Supplemental Table 1). Supplemental Figure 6 shows *wtf* gene names and  
258 locations in the four strains.



259

## 260 **Pervasive nonallelic gene conversion between *wtf* genes**

261 To examine *wtf* gene evolution, we aligned their coding sequences and generated a maximum  
262 likelihood phylogenetic tree. Naively, we expected that sets of genes from the four sequenced  
263 strains that are found in syntenic loci would group together in well-supported clades on the tree.  
264 However, syntenic genes grouped with one another in only a few clades of the tree. The *wtf7*,  
265 *wtf11*, *wtf14*, and *wtf15* genes each form well-supported clades that do not include genes from  
266 other loci (bootstrap values >95%; Supplemental data and Supplemental Figure 7). Each of  
267 these genes is quite distinct from other *wtf* genes (separated by long branches). The alleles of  
268 the *wtf12* and *wtf17* genes also form well-supported clades (>80% support), albeit less diverged  
269 from their nearest neighbors (Supplemental Figure 7). These genes however, appear to be  
270 losing function in at least some strains: shared inactivating mutations in the *wtf12* gene in all  
271 four strains indicate that it pseudogenized prior to the divergence of the strains, and the *Sp* and  
272 *Sk* sequences of *wtf17* also appear pseudogenized.

273

274 Despite clear synteny and a very short time (~2,300 years) since these yeast isolates shared a  
275 common ancestor (32), none of the remaining syntenic *wtf* gene sets form well-supported  
276 clades that exclude *wtf* genes from other loci. Furthermore, there are clear examples of well-  
277 supported clades containing genes from different loci. For example, one well-supported clade  
278 includes the following genes: *Sk wtf29* and *wtf30*; *Sp wtf19* and *wtf23*; FY29033 *wtf8*, *wtf30* and  
279 *wtf38*; and CBS5557 *wtf29* (highlighted in Supplemental Figure 7). Finally, the tree contains two  
280 well-supported terminal nodes in which gene pairs at distinct loci from the same isolate (*Sp*  
281 *wtf19* and *wtf23* as well as FY29033 *wtf1* and *wtf35*) form a clade, while syntenic genes from  
282 other isolates are in distinct clades. These observations are consistent with gene conversion  
283 within the *wtf* gene family.

284

285 To analyze whether entire *wtf* coding sequences might be over-writing one another by gene  
286 conversion, or whether only portions of the genes are involved, we performed GARD (Genetic  
287 Algorithm for Recombination Detection) analysis on our coding sequence alignment to test for  
288 recombination between *wtf* genes (Supplemental Figure 8) (37). This algorithm tests the  
289 hypothesis that the same phylogenetic tree represents the entire alignment or if different trees  
290 best represent different segments due to recombination. GARD analysis found that the  
291 hypothesis of multiple segments with different trees was >100 times more likely than the  
292 hypothesis of a single tree. In addition, GARD identified three likely segments ( $p < 0.01$ ,

293 Supplemental Figure 8). Together, our observations are consistent with widespread nonallelic  
294 gene conversion between members of the *wtf* gene family excluding *wtf7*, *wtf11*, *wtf14* and  
295 *wtf15*. Such gene conversion obscures the evolutionary history of the *wtf* gene family and  
296 means that functional inferences can often not be made across strains based on shared  
297 synteny. This work confirms and expands observations made by Hu et al. who previously  
298 described gene conversion among *Sp* and CBS5557 *wtf* genes (24).

299

300 To further explore within-*wtf* gene conversion, we compared the genes (excluding *wtf7*, *wtf11*,  
301 *wtf14* and *wtf15*) in segments. Most *wtf* genes have either five or six exons. For ease of  
302 comparison, we named the exons 1-6 based on the longest *wtf* genes (Figure 2). The five-exon  
303 genes are missing 'exon 4' but the remaining exons can be aligned to those of the six-exon  
304 genes (Figure 2). After excluding repetitive regions in exons 3 and 6 (discussed below), we  
305 generated alignments and trees (Supplemental figures 9-16, Supplemental Data) for each exon  
306 separately. We also generated alignments and trees for a conserved region (133-289 base  
307 pairs) upstream of the start codon and for intron 1, regions that in intact *wtf* drive genes  
308 presumably contain the promoters for the antidote and poison transcripts, respectively (23, 27).  
309 The division between segments along intron/exon boundaries was arbitrary: there is no reason  
310 that gene conversion should show breakpoints at these boundaries.

311

312 Strikingly, trees made from different gene segments do not show the same topology as one  
313 another (Supplemental figures 6-19, Supplemental Data). Although the short length of each  
314 segment means that bootstrap support values are generally low throughout the trees, each tree  
315 shows a broad subdivision between two main clades of *wtf* genes. For all but the shortest  
316 segment (exon 5), these two main clades are separated by a node with high bootstrap support.  
317 However, for different gene segments, the two main clades group different subsets of genes  
318 together. For example, while for exon 3, *Sp wtf9* and *Sk wtf9* group together very closely in the  
319 tree and share 96% nucleotide identity, in contrast for exon 2 they are in different main clades  
320 (separated by a well-supported node) and show very remote homology (Supplemental figures  
321 10 and 11). One possible explanation for this pattern is that their high similarity in exon 3  
322 reflects their original syntenic relationship, but that relationship has been obscured in exon 2 by  
323 gene conversion from another *wtf* gene overwriting sequence in one or both of the strains.

324

325 We used the broad clade divisions defined by the trees for each segment to generate a cartoon  
326 representation of this 'patchwork' evolutionary history. In the cartoon, each color represents one

327 of the two well supported clades for each gene segment (Figure 2A). We used the color coding  
328 to guide grouping the full length *wtf* genes as shown (Figure 2A). We then carried out four-  
329 gamete tests to look for evidence of gene conversion between the gene segments (38). Briefly,  
330 we considered each of the two major clades for each segment as alternate alleles. We then did  
331 pairwise comparisons of all gene segments to assay how many of the four possible allele  
332 (clade) combinations were observed. The four-gamete test is positive when all four  
333 combinations are present; while a simple accumulation of individual sequence changes could  
334 explain up to three combinations, the fourth combination can only be explained by  
335 recombination (Figure 2B). We found that 19/28 comparisons yielded a positive four-gamete  
336 test. While we cannot reconstruct the full history and exact boundaries of gene conversion  
337 among *wtf* genes in each strain, it is clear that the gene family has experienced rampant  
338 sequence exchange that could have facilitated rapid functional divergence of the gene family by  
339 bringing together new combinations of sequence variants.

340

#### 341 **DNA double strand break hotspots are enriched near *wtf* genes**

342 The high level of nonallelic gene conversion among *wtf* genes is surprising because nonallelic  
343 homologous recombination (also known as ectopic recombination) is thought to be generally  
344 suppressed (39). This suppression is important because recombination events between  
345 nonallelic loci can result in genetic exchanges (crossovers) that cause deleterious chromosome  
346 rearrangements (39). The gene conversion among *wtf* genes we observe could be caused by  
347 increased frequency of nonallelic homologous recombination amongst these genes, or due to  
348 selection favoring the products of gene conversion events. The two explanations are not  
349 mutually exclusive and both could contribute. The latter idea is difficult to test, so we focused on  
350 the first idea. Gene conversion results from the repair of DNA double strand breaks (DSBs). The  
351 initiating DSB could happen near or within the gene converted locus itself, or the break could  
352 happen in a different (donor) site that shares homology with the gene converted locus (e.g.,  
353 another similar *wtf* gene) (39). DSBs arise at low frequencies in vegetative cells, but are  
354 dramatically induced (~58 breaks per cell in *Sp*) during meiosis (40). Due to their greater  
355 numbers and the fact that they have been mapped, we focused our analyses on meiotic DSBs.

356

357 Meiotic DSBs do not form randomly and are instead enriched in regions called 'hotspots.' *Sp*  
358 has 602 DSB hotspots that are generally conserved between *Sp* and *Sk*, so it is reasonable to  
359 assume the *Sp* hotspot map represents the *S. pombe* group (25, 40). The *wtf* genes could have  
360 elevated gene conversion frequencies if all or a subset of them are near DSB hotspots. A factor

361 known as the ‘gene conversion tract length’ would affect how near to a break *wtf* genes must be  
362 in order to be involved in gene conversion events as either donors or recipients. This tract  
363 length specifies the amount of DNA that may be incorporated in the DSB repair event and  
364 potentially involved in gene conversion. The gene conversion tract length has only been  
365 coarsely measured in *Sp* for allelic meiotic recombination at one locus (*ade6*). The observed  
366 gene conversion tract lengths were generally less than 1 kb and occasionally >2 kb (41). It is  
367 unknown if gene conversion varies by locus, and whether tract length is different for allelic repair  
368 than for nonallelic recombination. Given this high level of uncertainty, we designated hotspots  
369 within 2.5 kb of a *wtf* gene as potential sources of initiating gene conversion events.

370  
371 We looked for an association between the 602 previously defined *Sp* DSB hotspots and *wtf* loci  
372 by calculating the distance between each end of the *wtf* coding sequences and the nearest DSB  
373 hotspot (40). There was no DSB hotspot 5’ to the first *wtf* gene on chromosome 3, so we only  
374 considered the hotspot 3’ of this coding sequence yielding 47 data points (2 ends of each of the  
375 24 loci containing *wtf* genes minus 1). We did the same comparison for all annotated coding  
376 sequences (29). We found that DSB hotspots were significantly enriched within 2.5 kb of *wtf* loci  
377 as compared to all coding sequences. This enrichment was also significant if we only  
378 considered hotspots within 1 kb (Table 1 G-test  $p < 0.01$ ). Overall, we found that 14 of the 24 *wtf*  
379 loci are within 2.5 kb of one or more hotspots.

380

| distance to DSB | ≤2500bp         | >2500bp      | ≤1000bp          | >1000bp      |
|-----------------|-----------------|--------------|------------------|--------------|
| all cds         | 1764 (17.4%)    | 8395 (82.6%) | 1103 (10.9%)     | 9056 (89.1%) |
| <i>wtf</i> loci | 18 (38.3%)      | 29 (61.7%)   | 13 (27.7%)       | 34 (72.3%)   |
|                 | p-value < 0.001 |              | p-value = 0.0015 |              |

381 **Table 1: DSB hotspots are enriched near *wtf* loci.**

382

383 These analyses suggest that close proximity of some genes to DSB hotspots likely contributes  
384 to the high levels of recombination within the *wtf* gene family. Interestingly, we observed no  
385 chromosome rearrangements with breakpoints in *wtf* genes in the 4 strains with assembled *wtf*  
386 genes despite the hotspots and evidence of gene conversion. This suggests that nonallelic  
387 homologous recombination events are either preferentially repaired as gene conversions, as  
388 opposed to crossovers, or that strains resulting from such crossovers have been removed by

389 selection because they often generate chromosomes missing essential genes and/or with  
390 inviable duplications.

391

### 392 **High diversity of intragenic repeats in *wtf* proteins**

393 Insertions and deletions within genes can be an additional source of evolutionary novelty that  
394 can result from errors during DNA replication or from recombination (42). We looked for  
395 evidence of such changes within *wtf* genes and found two repetitive regions that have frequently  
396 expanded and contracted during *wtf* evolution. The first of these is a region containing a well-  
397 conserved 33 base pair repeat sequence near the beginning of exon 3 in most *wtf* genes  
398 (Figure 3A). Not all of the repeat units are complete. The first repeat is routinely truncated to 21  
399 nucleotides, while the last repeat is truncated to between 14 and 26 nucleotides. The *wtf* genes  
400 have between 0 and 224 bp of sequence derived from this repeat (Figure 3B). A second  
401 dynamic repeat region occurs at the start of exon 6 in most genes in Classes 1 and 2 (Figure  
402 3C). This 21 base pair repeat unit is less conserved and not all repeat units are complete. This  
403 repeat comprises between 0 and 84 bp of sequence in *wtf* genes (Figure 3D). Both repeat  
404 regions appear unstable in that *wtf* alleles that are otherwise similar can vary in the number of  
405 repeat units. For example, the *Sp* and *Sk* alleles of *wtf4* are 93% identical outside of the  
406 repeats, but have different copy numbers of both repeat segments. These changes may be  
407 functionally important because the repeats often overlap predicted transmembrane domains.  
408 The function of these repeats is currently unknown, but the number of repeats found in exon 6  
409 can be important for conferring specificity between poison and antidote proteins (11).

410

### 411 **Positive selection implicates *wtf7* and *wtf11* in genetic conflict**

412 It is clear that gene duplication, deletion, gene conversion and changes in repeat units have all  
413 acted to generate extensive diversity in the *wtf* gene family. We also wondered whether  
414 individual amino acid changes have also played a role in increasing *wtf* diversity. We therefore  
415 analyzed the relationship between the number of nonsynonymous changes per nonsynonymous  
416 site (dN) and the number of synonymous changes per synonymous site (dS). In these analyses,  
417 dN/dS ratios near 1 are consistent with neutral protein evolution, meaning that amino acid  
418 changes in the gene are neither selected for or against. Alternatively, ratios that deviate  
419 significantly from 1 are expected when a gene is evolving under selection. Ratios less than 1  
420 are consistent with purifying selection, meaning that novel protein variants are selected against.  
421 For example, histone genes show very low dN/dS ratios, because novel variants in histones are  
422 generally deleterious and are thus removed by purifying selection. Ratios greater than 1 are

423 consistent with positive (diversifying) selection, meaning that novel protein variants have a  
424 selective advantage. Genes involved in genetic conflict often show signatures of positive  
425 selection (20, 21).

426

427 Unfortunately, our ability to perform dN/dS analysis in the *wtf* family is limited because the  
428 widespread nonallelic gene conversion (described above) we observe among *wtf* genes can  
429 seriously confound dN/dS analyses. However, we performed dN/dS analyses on the four *wtf*  
430 genes that appear to have escaped the effects of gene conversion: *wtf7*, *wtf11*, *wtf14* and *wtf15*  
431 (Figure 4A, Supplemental Figures 17-20). We found that some orthologous gene pairs were  
432 identical or nearly identical between isolates. For example, we found very few mutations  
433 distinguishing the *wtf14* orthologs. For *wtf11* and *wtf15*, pairwise comparisons between the  
434 orthologs revealed dN/dS values less than 1 for some pairs and dN/dS greater than 1 for others,  
435 but the overall number of changes was low, limiting the power of these analyses. For *wtf7*,  
436 however, more changes have accumulated, and there were strong signatures of positive  
437 selection: all pairwise comparisons with more than one mutation had dN/dS greater than 3  
438 (Figure 4A).

439

440 Overall, our dN/dS analyses were limited by the small number of isolates we assayed and in  
441 some cases the low number of codon changes. These small numbers make actual deviations of  
442 dN/dS from the neutral expectation difficult to distinguish from random fluctuations. To  
443 overcome this limitation, we assembled the sequences of *wtf7*, *wtf11*, *wtf14* and *wtf15* from 54  
444 additional *S. pombe* isolates using published 100 base pair paired-end read data (33). This was  
445 possible due to the large divergence between each of these genes and all other *wtf* genes. In  
446 many cases, the sequences of orthologous genes were identical between the strains. After  
447 removing redundant sequences, we were left with 9 alleles of *wtf7*, 14 alleles of *wtf11*, 8 alleles  
448 of *wtf14* and 10 alleles of *wtf15*. We aligned these sequences and screened each alignment for  
449 evidence of gene conversion using the GARD algorithm (37), but did not observe signatures of  
450 gene conversion.

451

452 We then tested each alignment for evidence of positive selection (Figure 4B). First, we used the  
453 codeml algorithm from the PAML (phylogenetic analyses by maximum likelihood) package (43)  
454 to test for positive selection on a subset of codons in each gene. We found statistical support for  
455 positive selection in both *wtf7* and *wtf11*, but not *wtf14* or *wtf15* (Figure 4B). We next used the  
456 BUSTED (Branch-site Unrestricted Statistical Test for Episodic Diversification) algorithm from

457 the HyPhy suite which tests for evidence of selection on at least a subset of codons in at least a  
458 subset of the included sequences. BUSTED found support for positive selection on a subset of  
459 codons in *wtf7*, but not in *wtf11*, *wtf14* or *wtf15* (Figure 4B) (44). Overall these analyses support  
460 the hypothesis that *wtf7* and *wtf11* are engaged in genetic conflicts.

461

462 **Some *wtf* genes show characteristics of poison-antidote systems, whereas others may**  
463 **encode antidote-only suppressors**

464 In addition to facilitating visualization of gene conversion, we grouped the *wtf* genes into the  
465 three major classes shown in Figure 2 to guide future functional analyses. Briefly, we dubbed  
466 the genes that contain in-frame start codons just upstream or near the beginning of exon 2  
467 'Class 1' genes. These exon 2 ATG codons encode the start of Wtf poison protein isoforms and  
468 are shared by all of the previously known drivers (Figure 2) (11, 23, 24). In addition, we used  
469 published long read RNA sequences to confirm that all the *Sp* Class 1 genes have an alternate  
470 transcriptional start site within intron 1 (Supplemental Figure 1) that could encode poison  
471 transcript isoforms (30). We therefore predict that Class 1 genes are intact meiotic drivers in  
472 which transcripts that include all exons encode antidote proteins, and transcripts which exclude  
473 exon 1 encode poison proteins.

474

475 Most other genes lack both a transcriptional isoform that excludes exon 1 and an in-frame ATG  
476 near the start of exon 2: we classify these as Class 2 genes. Due to similarity between the Class  
477 2 genes and the antidote proteins produced by known drivers, we predict these genes are  
478 suppressors of *wtf* drive genes and lack the poison isoform (22). Indeed, Class 2 contains the  
479 only known *wtf* drive suppressor, *Sp wtf18-2* (11). Consistent with the predicted lack of poison  
480 isoform, the *Sk wtf5* and *wtf6* genes do not cause drive in *Sp* (23). Notably, we found no *wtf*  
481 genes that lack exon 1 that would encode only poison isoforms: it would have been very  
482 surprising to find such genes as we predict they would encode 'suicide' alleles unless they were  
483 very closely linked to a completely effective suppressor.

484

485 Class 3 consists of the remaining genes: *wtf7*, *wtf11*, *wtf14* and *wtf15*. These genes are diverse  
486 and are grouped together only because they all have unknown functions. These genes do have  
487 an in-frame start codon near the start of exon 2, like known drivers. However, long read RNA  
488 sequencing data showed no evidence of alternate transcripts for these genes beginning in intron  
489 1 (Supplemental Figure 1), so we cannot make a clear prediction about whether they actually

490 encode poison isoforms (30). Furthermore, their increased sequence divergence from the rest  
491 of the *wtf* family could suggest divergent functions.

492

### 493 **Discussion**

494 Our study extends previous evolutionary analyses to demonstrate extremely dynamic evolution  
495 of the *wtf* gene family in multiple lineages of *S. pombe* (24). Although the genomes of different  
496 isolates of the *S. pombe* group are nearly identical (>99.5% DNA sequence identity) (32), the  
497 number of *wtf* genes (including pseudogenes) found in the different isolates we studied is  
498 variable and the sequences of syntenic genes can be very diverged. This rapid evolution  
499 scenario is consistent with molecular arms race models that predict rapid evolution of meiotic  
500 drivers and their suppressors (20). It also supports the idea that rapid evolution could be a  
501 hallmark of these genes that could be used, along with other features like germline expression  
502 and lineage restriction, to facilitate their discovery.

503

### 504 **Model for *wtf* family expansion on chromosome 3**

505 As noted by Bowen et al., the introns found in all *wtf* genes argue against gene family expansion  
506 by retrotransposition (27). These authors also suggested that some *wtf* genes co-duplicated  
507 with their associated LTRs. In other words, *wtf* genes took advantage of the ubiquity of  
508 distributed transposon sequences to spread within the genome via nonallelic gene conversion to  
509 preexisting LTRs, a process known as segmental duplication (45). As most *wtf* loci contain at  
510 least one *wtf* gene in the majority of the seven isolates analyzed here, we propose that the  
511 segmental duplications of *wtf* genes largely occurred prior to the divergence of these isolates  
512 and perhaps the *S. pombe* group.

513

514 The exploitation of distributed transposon sequences to facilitate the spread of meiotic drivers  
515 may not be specific to *wtf* genes. Transposon sequences are also found near *Spok* genes, a  
516 different family of single-gene killer meiotic drivers in the fungus *Podospora anserina*. *Spok*  
517 genes are found in as many as 11 copies per genome in some species of fungi (9). Although it  
518 is unknown whether *Spok* genes are associated with transposons in other species, segmental  
519 duplication to preexisting transposon sequences may have also facilitated growth of the *Spok*  
520 gene family.

521

522 In addition to segmental duplication, tandem duplications (and deletions) also appear to have  
523 contributed to the expansion (and contraction) of the *wtf* gene family. Nonallelic recombination



524 and slippage during DNA replication could be contributing to duplications and deletions. These  
525 events appear to have continued after the divergence of the strains analyzed here because the  
526 number of *wtf* genes at any given locus varies (Figure 1C). For example, Hu et al. found that  
527 *wtf27*, *wtf33*, and *wtf35* gene were all apparently lost in the *Sp* isolate due to recombination  
528 between two LTRs in the same orientation that flanked the genes (24).

529  
530 Interestingly, like in the reference genome (*Sp*), the *wtf* genes in all the strains assayed are  
531 highly enriched on what is chromosome 3 in *Sp*. Bowen et al. proposed that this enrichment in  
532 *Sp* could reflect a different evolutionary origin for chromosome 3, suggesting that it was  
533 introgressed from a diverged strain with many *wtf* genes throughout the genome (27). If this is  
534 true, such an introgression event must have preceded the divergence of the strains analyzed  
535 here (Figure 1). We have proposed an alternative hypothesis, that the segmental duplication  
536 events spreading *wtf* genes occur genome-wide, but that the duplicates on chromosome 3 are  
537 preferentially maintained, because *S. pombe* can tolerate aneuploidy of only chromosome 3 and  
538 not the other chromosomes (22). This could be important because when two or more distinct *wtf*  
539 drivers compete (i.e. they are linked on opposite haplotypes), nearly all haploid gametes are  
540 expected to be destroyed. This was, in fact, observed when CSBS5557 *wtf9* and *wtf33* were  
541 competed at an allelic locus in *Sp* (24). Heterozygous aneuploid or heterozygous diploid  
542 gametes, however, inherit both drivers and should be immune to both *Wtf* poison proteins. *Sp*  
543 (and presumably other isolates) only tolerates aneuploidy of chromosome 3, so that the fitness  
544 costs of competing drivers could be uniquely offset on chromosome 3 (22).

545  
546 It is not clear why antidote-only *wtf* genes that act as suppressors of drive should specifically  
547 spread or be maintained on chromosome 3. Loci on this chromosome bear the greatest fitness  
548 cost of drivers. This is because sites on chromosome 3 are more likely to be linked in repulsion  
549 (i.e. on opposite haplotypes) to drivers that will destroy gametes that inherit them instead of the  
550 driver in heterozygous crosses. However, suppressors of drive are predicted to be favored at  
551 any unlinked locus because they increase fertility (7). It is therefore surprising that antidote-only  
552 *wtf* genes have not spread throughout the genome. We favor a model in which the frequent  
553 gene conversion amongst *wtf* genes likely leads to toggling between driving and suppressing *wtf*  
554 genes at any given locus. For example, we predict that the *wtf18* gene in FY29033 is a driver,  
555 but the *wtf18* alleles in *Sp* are suppressors of drive (Figure 2A) (11). This toggling could lead to  
556 selective maintenance of *wtf* suppressor loci on chromosome 3 due to the mechanism  
557 described above for drivers.

558

### 559 **Rapid evolution of *wtf* genes**

560 We observe three mechanisms driving innovation in *wtf* gene sequences. First, as observed by  
561 Hu et al. who previously assayed *Sp* and CBS5557, we found pervasive nonallelic gene  
562 conversion affecting most *wtf* genes (24). We demonstrated that this nonallelic gene conversion  
563 was not restricted to a specific portion of the genes and included promoters. The forces driving  
564 this gene conversion will require further investigation. It is possible that the *wtf* genes inherently  
565 undergo gene conversion at a high rate due to some intrinsic property. For example, the close  
566 proximity of a subset of *wtf* loci to meiotic DSB hotspots could facilitate nonallelic recombination  
567 within the family. It is also possible that the novel *wtf* sequences generated by gene conversion  
568 are frequently advantageous. For example, novel variants could drive or suppress other drivers  
569 and thus be maintained by selection.

570

571 Second, we found that the number of units of repeat sequences within exons 3 and 6 varies  
572 greatly. Such repetitive sequences are known to be unstable and several *wtf* alleles that are  
573 otherwise very similar vary in repeat copy number. Although the function of these repeat regions  
574 is not clear, the repeats often overlap predicted transmembrane domains, and repeat number  
575 can be functionally important. For example, *Sp wtf18* antidote alleles were only able to  
576 neutralize *Sp wtf13* poison alleles that had the same number of exon 6 repeats (11). It is  
577 possible that the presence of these repeats in *wtf* genes is maintained, at least in part, due to  
578 their hypermutability. A high capacity to facilitate rapid gene diversification could be beneficial in  
579 genes involved in genetic conflicts.

580

581 The third contributor to rapid *wtf* gene evolution is positive selection in at least the *wtf7* and  
582 *wtf11* genes, which show an excess of amino acid substitutions (Figure 4). Unfortunately,  
583 extensive gene conversion limited our analyses to four genes. The *wtf7* and *wtf11* genes have  
584 no known functions and are both highly diverged from the experimentally characterized *wtf*  
585 genes and each other. The rapid evolution of these genes, however, suggests that they too are  
586 engaged in genetic conflicts. We speculate that both genes are either meiotic drivers and/or act  
587 as modifiers of meiotic drive.

588

### 589 **Consequences of rapid evolution**

590 The rapid evolution of *wtf* genes has led each of the strains we assayed here to contain a  
591 unique suite of *wtf* alleles. The consequences of this *wtf* diversity on *S. pombe* fitness are

592 profound. When nonclonal isolates of *S. pombe* mate to produce diploids, it is very likely there  
593 will be heterozygosity at one or more *wtf* loci. When these diploids undergo meiosis to generate  
594 gametes, *wtf* heterozygosity can lead to dramatic loss of fertility due to meiotic drive. This *wtf*  
595 heterozygosity is a major cause of the infertility observed in both *Sp/Sk* and *Sp/CBS5557*  
596 heterozygous diploids and likely contributes to the generally low fertility of outcrossed (i.e.  
597 heterozygous) *S. pombe* diploids (22-24, 46, 47). Driving *wtf* genes are thus limiting the ability of  
598 *S. pombe* to enjoy all the fitness benefits of sexual reproduction, perhaps putting this species on  
599 a path to extinction.

600

### 601 **Lessons for the design of gene drives**

602 The themes we describe for *wtf* gene evolution may be instructive for designing gene drives.  
603 Gene drives are engineered drive systems used to control natural populations. The general idea  
604 is that natural or artificial drivers can be used to spread traits (e.g. disease resistance)  
605 throughout a population or to eliminate a population, for example by generating extreme sex  
606 ratio imbalances (48). Analyses of natural drivers and drive suppressors, such as those of the  
607 *wtf* family, may prove useful for predicting how engineered gene drives (particularly gamete  
608 killers) may evolve if released in natural populations. For example, compact gene drives may  
609 duplicate to novel loci within a genome. This risk may be particularly high if the gene drives are  
610 integrated next to transposons or other dispersed repetitive elements.

611

### 612 **Materials and Methods**

#### 613 **Yeast strains and whole genome sequencing**

614 The *Sp* (SZY643) and *Sk* (SZY661) strains are described in Nuckolls and Bravo Nunez et al.  
615 (23). We obtained all other strains from the National BioResource Center, Japan. We prepared  
616 genomic DNA using QIAGEN Genomic-tips (Catalog number 10262 and 10243) using the  
617 QIAGEN DNA buffer set (Catalog number 19060). We followed the kit protocol except that we  
618 extended the lyticase treatment to 18 hours and the RNase A/Proteinase K treatment to 5  
619 hours. The Stowers Institute Molecular Biology core facility prepared the sequencing libraries  
620 using the Illumina Nextera Mate-Pair Sample Prep Kit (Cat. No. FC-132-1001). 5-8 kb fragments  
621 were selected using a BluePippin machine (Sage Science). The libraries were sequenced (150  
622 base pair paired-end reads) on an Illumina MiSeq using the MiSeq Reagent Kit v2 (300 cycle)  
623 (Cat. No. MS-102-2002). Sequence data are available in SRA (accession no. PRJNA476416).

624

#### 625 **Assaying *wtf* gene numbers**

626 We used Geneious version 10.0.7 (<https://www.geneious.com>) for all sequence analyses,  
627 unless otherwise stated, using the 'map to reference function' for all short-read alignments. To  
628 find *wtf* loci in *Sk*, we identified read pairs from the mate-pair library in which one (or both) reads  
629 aligned to a library containing the 25 *Sp wtf* genes ('medium-low sensitivity' aligner setting)  
630 (Steps 1 and 2 in Figure 1A). For the other genomes, we also included the *Sk wtf* genes as  
631 reference sequences. From those *wtf*-matching read pairs, we then isolated any 'partner' reads  
632 that did not align to *wtf* genes by again mapping reads to our reference set of *wtf* genes  
633 ('medium sensitivity' setting), this time saving only the individual reads that failed to align to any  
634 *wtf* gene (Figure 1A Step 3). We then took these '*wtf*-partner' reads and aligned them to the *Sp*  
635 reference genome ('medium sensitivity' setting) (Figure 1A Step 4). This generated pileups of  
636 reads flanking *wtf* loci. We inspected the pileups manually to infer the number of *wtf* genes at  
637 each locus based on the width and pattern of the pileups, as described in the text. For *Sk* and  
638 FY29033 these inferences were confirmed or corrected by assembling the *wtf* loci (see below).

639

#### 640 **Assembling *wtf* genes**

641 To assemble the *wtf* gene(s) at a given locus, we used flanking unique sequences as 'bait' to  
642 identify all read pairs in the region, and then performed individual *de novo* assemblies for each  
643 *wtf* locus separately. This approach should avoid misassemblies that can occur in whole  
644 genome assemblies at repetitive regions like *wtf* loci. In more detail, we first manually identified  
645 coordinates of the sequence pileups described above, adding ~2 kb flanking sequence (Figure  
646 1D, orange bars under the pileups). We excluded LTR sequences and other repetitive DNA  
647 sequences from these regions and denote them 'orange regions'. We identified all mate-pairs  
648 that align to these orange regions ('medium low sensitivity' setting) (Figure 1D, Step 1). We then  
649 filtered those reads so that we retained only candidate *wtf* locus reads, and not those from  
650 flanking regions. To do this, we defined two additional reference regions flanking the *wtf* locus  
651 ('green regions') that extend the orange region to within ~500 bp of the *wtf* locus and by ~15 kb  
652 in the other direction (Figure 1D, green bars under the pileups). We then aligned the read pairs  
653 defined in Step 1 to the green regions ('medium sensitivity' setting), retaining only individual  
654 reads that failed to align to the green regions; these reads represent candidate *wtf* locus reads  
655 (Figure 1D Steps 2 and 3). Finally, we assembled these candidate *wtf* reads using the Geneious  
656 'de novo assemble' function ('medium sensitivity' setting) (Figure 1D Step 4). We obtained 1-4  
657 contigs in most of these assemblies that we were able to stitch together manually using known  
658 *wtf* gene orientations and sequence overlaps. Gene sequences and annotations are available in  
659 GenBank (accession no. MH837193-MH837230 and MH837431-MH837459).

660

### 661 **DNA sequence alignments, tree construction and sequence logos**

662 We aligned DNA sequences of the full length *wtf* genes (or of *wtf* gene segments) in Geneious  
663 using the Geneious aligner with the 'global alignment without free end gaps' setting. All  
664 alignments are provided as supplemental data. We then generated trees in Geneious using the  
665 PHYML plugin (version 2.2.3) with the default settings (HKY85 substitution model, set to  
666 optimize tree topology branch length and substitution rate, NNI topology search) with 100  
667 bootstraps. For exons 3 and 6, we aligned only sequences downstream of the repetitive regions  
668 found near the beginning of those exons (Figure 3). For *wtf* family-wide gene conversion  
669 analysis, we used ran a command-line version of the GARD algorithm (using the general  
670 discrete model of site-to-site rate variation with 3 rate classes) (37). We used Weblogo3  
671 (<http://weblogo.threeplusone.com>) to generate sequence logos of the repetitive regions (49).

672

### 673 **Analysis of selective pressures**

674 For the initial dN/dS analyses, we first used Geneious to generate a codon alignment of the  
675 *wtf7*, *wtf11*, *wtf14* and *wtf15* genes using the 'translation align' function with the default settings.  
676 We then used codeml executed from PAML 4.8 to estimate dN, dS and dN/dS (runmode -2,  
677 seqtype 1, CodonFreq 0, model 0, NSsites 0, icode 0, fix\_kappa 1, fix\_omega 0, and omega  
678 0.5) (43).

679

680 For the extended analyses, we mapped paired-end reads from 54 additional *S. pombe* strains to  
681 the *Sp* reference genome to generate consensus sequences of *wtf7*, *wtf11*, *wtf14* and *wtf15* in  
682 the additional strains (33). The assembled sequence of these genes are available in GenBank  
683 (accession no. MH837181-MH837192 and MH837231-MH837430). We then codon-aligned a  
684 total of 57 sequences for each gene, and removed redundant sequences from each alignment  
685 using a custom script. We used the GARD algorithm (via the DataMonkey website) to screen  
686 each alignment for evidence of gene conversion (using the general discrete model of site-to-site  
687 rate variation with 3 rate classes) (37). GARD did not find evidence for gene conversion in the  
688 *wtf7*, *wtf11*, *wtf14* or *wtf15* alignments. We also used our alignments of *wtf7*, *wtf11*, *wtf14* and  
689 *wtf15* as input into the BUSTED algorithm (44), run via the DataMonkey website, to test for  
690 positive selection on a subset of sites in a subset of lineages. We also generated phylogenies  
691 from each alignment using PHYML (50) (GTR substitution model, 4 substitution rate categories,  
692 estimating the proportion of invariant sites) and used these trees and alignments as input to the  
693 codeml algorithm from the PAML package (43). We compared model 8 (M8), which allows

694 positive selection at a subset of sites, to each of two control models, model 7 (M7) or model 8a  
695 (M8a). In each case we compared twice the difference in log-likelihoods between the two  
696 models with a chi-squared distribution with 2 (M8 vs. M7) or 1 (M8 vs. M8a) degrees of freedom  
697 to obtain a p-value. We used the F61 codon model and a starting dN/dS of 1, but also verified  
698 that our findings of positive selection in *wtf7* and *wtf11* are robust to the use of alternative  
699 parameters (codon model F3x4, and starting omega of 0.4 or 3 for M7 and M8 - starting omega  
700 cannot be varied for M8a).

701

## 702 **Acknowledgements**

703 The authors thank Blake Billmyre and other members of the Zanders laboratory for helpful  
704 discussions and for comments on the manuscript. Gene sequences and annotations are  
705 available in GenBank (accession no. MH837181-MH837459). This work was supported by the  
706 Stowers Institute for Medical Research and the National Institutes of Health (NIH) award  
707 number R00GM114436 (SEZ). JMY is supported by NIH award number R01GM074108 to  
708 Harmit S. Malik.

709

## 710 **Competing interests**

711 SEZ: Inventor on patent application based on *wtf* killers. Patent application serial 62/491,107.  
712 MTE and JMY declare that no competing interests exist.

## 713 **References**

- 714 1. Burt A, Trivers R. Genes in conflict : the biology of selfish genetic elements. Cambridge,  
715 Mass.: Belknap Press of Harvard University Press; 2006.
- 716 2. Lindholm AK, Dyer KA, Firman RC, Fishman L, Forstmeier W, Holman L, et al. The  
717 ecology and evolutionary dynamics of meiotic drive. Trends Ecol Evol. 2016;31(4):315-26.
- 718 3. Bravo Núñez MA, Nuckolls NL, Zanders SE. Genetic villains: killer meiotic drivers.  
719 Trends Genet. 2018;34(6):424-33.
- 720 4. Yu X, Zhao Z, Zheng X, Zhou J, Kong W, Wang P, et al. A selfish genetic element  
721 confers non-Mendelian inheritance in rice. Science. 2018;360(6393):1130-2.
- 722 5. Shen R, Wang L, Liu X, Wu J, Jin W, Zhao X, et al. Genomic structural variation-  
723 mediated allelic suppression causes hybrid male sterility in rice. Nat Commun. 2017;8(1):1310.
- 724 6. Xie Y, Xu P, Huang J, Ma S, Xie X, Tao D, et al. Interspecific hybrid sterility in rice is  
725 mediated by *OgTPR1* at the *S1* locus encoding a peptidase-like protein. Mol Plant.  
726 2017;10(8):1137-40.

- 727 7. Crow JF. Why is Mendelian segregation so exact? *Bioessays*. 1991;13(6):305-12.
- 728 8. Tao Y, Masly JP, Araripe L, Ke Y, Hartl DL. A sex-ratio meiotic drive system in  
729 *Drosophila simulans*. I: an autosomal suppressor. *PLoS Biol*. 2007;5(11):e292.
- 730 9. Grognet P, Lalucque H, Malagnac F, Silar P. Genes that bias Mendelian segregation.  
731 *PLoS Genet*. 2014;10(5):e1004387.
- 732 10. Lin CJ, Hu F, Dubruille R, Vedanayagam J, Wen J, Smibert P, et al. The hpRNA/RNAi  
733 pathway is essential to resolve intragenomic conflict in the *Drosophila* male germline. *Dev Cell*.  
734 2018;46(3):316-26 e5.
- 735 11. Bravo Núñez MA, Lange JJ, Zanders, SE. A suppressor of a *wtf* poison-antidote meiotic  
736 driver acts via mimicry of the driver's antidote. Submitted.
- 737 12. Phadnis N, Orr HA. A single gene causes both male sterility and segregation distortion in  
738 *Drosophila* hybrids. *Science*. 2009;323(5912):376-9.
- 739 13. Tao Y, Araripe L, Kingan SB, Ke Y, Xiao H, Hartl DL. A sex-ratio meiotic drive system in  
740 *Drosophila simulans*. II: an X-linked distorter. *PLoS Biol*. 2007;5(11):e293.
- 741 14. Dawe RK, Lowry EG, Gent JI, Stitzer MC, Swentowsky KW, Higgins DM, et al. A  
742 kinesin-14 motor activates neocentromeres to promote meiotic drive in maize. *Cell*.  
743 2018;173(4):839-50 e18.
- 744 15. Didion JP, Morgan AP, Clayshulte AM, McMullan RC, Yadgary L, Petkov PM, et al. A  
745 multi-megabase copy number gain causes maternal transmission ratio distortion on mouse  
746 chromosome 2. *PLoS Genet*. 2015;11(2):e1004850.
- 747 16. Fishman L, Saunders A. Centromere-associated female meiotic drive entails male  
748 fitness costs in monkeyflowers. *Science*. 2008;322(5907):1559-62.
- 749 17. Akera T, Chmatal L, Trimm E, Yang K, Aonbangkhen C, Chenoweth DM, et al. Spindle  
750 asymmetry drives non-Mendelian chromosome segregation. *Science*. 2017;358(6363):668-72.
- 751 18. Cocquet J, Ellis PJ, Mahadevaiah SK, Affara NA, Vaiman D, Burgoyne PS. A genetic  
752 basis for a postmeiotic X versus Y chromosome intragenomic conflict in the mouse. *PLoS*  
753 *Genet*. 2012;8(9):e1002900.
- 754 19. Helleu Q, Gerard PR, Dubruille R, Ogereau D, Prud'homme B, Loppin B, Montchamp-  
755 Moreau C. Rapid evolution of a Y-chromosome heterochromatin protein underlies sex  
756 chromosome meiotic drive. *Proc Natl Acad Sci U S A*. 2016;113(15):4110-5.
- 757 20. McLaughlin RN, Jr., Malik HS. Genetic conflicts: the usual suspects and beyond. *J Exp*  
758 *Biol*. 2017;220(Pt 1):6-17.
- 759 21. Daugherty MD, Malik HS. Rules of engagement: molecular insights from host-virus arms  
760 races. *Annu Rev Genet*. 2012;46:677-700.

- 761 22. López Hernández JF, Zanders SE. Veni, vidi, vici: the success of *wtf* meiotic drivers in  
762 fission yeast. *Yeast*. 2018.
- 763 23. Nuckolls NL, Bravo Núñez MA, Eickbush MT, Young JM, Lange JJ, Yu JS, et al. *wtf*  
764 genes are prolific dual poison-antidote meiotic drivers. *eLIFE*. 2017;6.
- 765 24. Hu W, Jiang ZD, Suo F, Zheng JX, He WZ, Du LL. A large gene family in fission yeast  
766 encodes spore killers that subvert Mendel's law. *eLIFE*. 2017;6.
- 767 25. Zanders SE, Eickbush MT, Yu JS, Kang JW, Fowler KR, Smith GR, Malik HS. Genome  
768 rearrangements and pervasive meiotic drive cause hybrid infertility in fission yeast. *eLIFE*.  
769 2014;3:e02630.
- 770 26. Wood V, Gwilliam R, Rajandream MA, Lyne M, Lyne R, Stewart A, et al. The genome  
771 sequence of *Schizosaccharomyces pombe*. *Nature*. 2002;415(6874):871-80.
- 772 27. Bowen NJ, Jordan IK, Epstein JA, Wood V, Levin HL. Retrotransposons and their  
773 recognition of pol II promoters: a comprehensive survey of the transposable elements from the  
774 complete genome sequence of *Schizosaccharomyces pombe*. *Genome Res*. 2003;13(9):1984-  
775 97.
- 776 28. Wood V, Harris MA, McDowall MD, Rutherford K, Vaughan BW, Staines DM, et al.  
777 PomBase: a comprehensive online resource for fission yeast. *Nucleic Acids Res*.  
778 2012;40(Database issue):D695-9.
- 779 29. McDowall MD, Harris MA, Lock A, Rutherford K, Staines DM, Bahler J, et al. PomBase  
780 2015: updates to the fission yeast database. *Nucleic Acids Res*. 2015;43(Database  
781 issue):D656-61.
- 782 30. Kuang Z, Boeke JD, Canzar S. The dynamic landscape of fission yeast meiosis  
783 alternative-splice isoforms. *Genome Res*. 2016.
- 784 31. Hu W, Suo F, Du LL. Bulk segregant analysis reveals the genetic basis of a natural trait  
785 variation in fission yeast. *Genome Biol Evol*. 2015;7(12):3496-510.
- 786 32. Jeffares DC. The natural diversity and ecology of fission yeast. *Yeast*. 2018;35(3):253-  
787 60.
- 788 33. Jeffares DC, Rallis C, Rieux A, Speed D, Prevorovsky M, Mourier T, et al. The genomic  
789 and phenotypic diversity of *Schizosaccharomyces pombe*. *Nat Genet*. 2015;47(3):235-41.
- 790 34. Singh G, Klar AJ. The 2.1-kb inverted repeat DNA sequences flank the *mat2,3* silent  
791 region in two species of *Schizosaccharomyces* and are involved in epigenetic silencing in  
792 *Schizosaccharomyces pombe*. *Genetics*. 2002;162(2):591-602.
- 793 35. Rhind N, Chen Z, Yassour M, Thompson DA, Haas BJ, Habib N, et al. Comparative  
794 functional genomics of the fission yeasts. *Science*. 2011;332(6032):930-6.



- 795 36. Kim DU, Hayles J, Kim D, Wood V, Park HO, Won M, et al. Analysis of a genome-wide  
796 set of gene deletions in the fission yeast *Schizosaccharomyces pombe*. Nat Biotechnol.  
797 2010;28(6):617-23.
- 798 37. Kosakovsky Pond SL, Posada D, Gravenor MB, Woelk CH, Frost SD. Automated  
799 phylogenetic detection of recombination using a genetic algorithm. Mol Biol Evol.  
800 2006;23(10):1891-901.
- 801 38. Hudson RR, Kaplan NL. Statistical properties of the number of recombination events in  
802 the history of a sample of DNA sequences. Genetics. 1985;111(1):147-64.
- 803 39. Sasaki M, Lange J, Keeney S. Genome destabilization by homologous recombination in  
804 the germ line. Nat Rev Mol Cell Biol. 2010;11(3):182-95.
- 805 40. Fowler KR, Sasaki M, Milman N, Keeney S, Smith GR. Evolutionarily diverse  
806 determinants of meiotic DNA break and recombination landscapes across the genome. Genome  
807 Res. 2014;24(10):1650-64.
- 808 41. Grimm C, Bahler J, Kohli J. M26 recombinational hotspot and physical conversion tract  
809 analysis in the *ade6* gene of *Schizosaccharomyces pombe*. Genetics. 1994;136(1):41-51.
- 810 42. Verstrepen KJ, Jansen A, Lewitter F, Fink GR. Intragenic tandem repeats generate  
811 functional variability. Nat Genet. 2005;37(9):986-90.
- 812 43. Yang Z. PAML 4: phylogenetic analysis by maximum likelihood. Mol Biol Evol.  
813 2007;24(8):1586-91.
- 814 44. Murrell B, Weaver S, Smith MD, Wertheim JO, Murrell S, Aylward A, et al. Gene-wide  
815 identification of episodic selection. Mol Biol Evol. 2015;32(5):1365-71.
- 816 45. Dennis MY, Eichler EE. Human adaptation and evolution by segmental duplication. Curr  
817 Opin Genet Dev. 2016;41:44-52.
- 818 46. Avelar AT, Perfeito L, Gordo I, Ferreira MG. Genome architecture is a selectable trait  
819 that can be maintained by antagonistic pleiotropy. Nat Commun. 2013;4:2235.
- 820 47. Jeffares DC, Jolly C, Hoti M, Speed D, Shaw L, Rallis C, et al. Transient structural  
821 variations have strong effects on quantitative traits and reproductive isolation in fission yeast.  
822 Nat Commun. 2017;8:14061.
- 823 48. Burt A. Heritable strategies for controlling insect vectors of disease. Philos Trans R Soc  
824 Lond B Biol Sci. 2014;369(1645):20130432.
- 825 49. Crooks GE, Hon G, Chandonia JM, Brenner SE. WebLogo: a sequence logo generator.  
826 Genome Res. 2004;14(6):1188-90.

827 50. Guindon S, Dufayard JF, Lefort V, Anisimova M, Hordijk W, Gascuel O. New algorithms  
828 and methods to estimate maximum-likelihood phylogenies: assessing the performance of  
829 PhyML 3.0. *Syst Biol.* 2010;59(3):307-21.

830

### 831 **Figure Legends**

#### 832 **Figure 1: A genomics approach identifies and assembles *wtf* gene sequences.** A)

833 Schematic of the strategy we used to identify *wtf* gene locations. B) Examples of three *Sp* loci  
834 are shown to illustrate how read pileups (from strategy described in A) flank loci with zero, one  
835 or two *wtf* genes. In each plot, the x-axis shows relative position in the *Sp* reference genome,  
836 and the y-axis shows the number of reads mapping to each base. C) A map of *wtf* gene  
837 distribution in seven isolates of *S. pombe*. The map shows the three chromosomes of the *Sp*  
838 karyotype, although this karyotype is not shared by all isolates. The inset box indicates total *wtf*  
839 gene numbers (including pseudogenes) in each strain. The numbers for FY28974, FY28989  
840 and FY29030 (in black) are estimates because we did not assemble all *wtf* loci in those strains.  
841 D) Schematic of the strategy we used to assemble *wtf* gene sequences in *Sk* and FY29033.

842

#### 843 **Figure 2: Classification of *wtf* genes based on sequence, and evidence of nonallelic gene**

844 **conversion.** A) Although they are quite diverged from each other, *wtf7*, *wtf11*, *wtf14* and *wtf15*  
845 were placed in a shared class because their sequences are unlike any functionally  
846 characterized genes. For the remaining genes, individual gene segments (each exon, intron 1  
847 and the upstream regions) from all genes were aligned and classified based on the major clades  
848 in maximum likelihood trees (see text for details). Each segment's clades were color-coded for  
849 display purposes (i.e. black/white, black/green coding), and genes were grouped based on gene  
850 segment patterns. On the left, we display cartoons of gene structures for each group, with 'M'  
851 indicating in-frame start codons, '/' indicating frameshift mutations, and '\*' indicating in-frame  
852 stop codons. The repeat regions found in exons 3 and 6 are shown in brown. The names of  
853 genes in each class are listed on the right, with the gene illustrated in the cartoon underlined,  
854 and pseudogenes denoted with asterisks after gene names. The predicted function of each  
855 gene class is shown on the far right. Genes with experimentally verified phenotypes have their  
856 names outlined with purple boxes. B) Pairwise four-gamete test for recombination (gene  
857 conversion) between all pairs of *wtf* gene segments for the genes in Classes 1 and 2. Orange  
858 boxes indicate that recombination likely occurred because all four segment combinations were  
859 observed. Purple boxes indicate that not all segment combinations were observed.

860

861 **Figure 3: Expansion and contraction of repeat sequences contributes to rapid *wtf* gene**  
862 **evolution.**

863 A) DNA (top) and amino acid (bottom) sequence logos representing the repeat region found in  
864 exon 3. B) The distribution of exon 3 repeat region size across all assembled *wtf* genes. The  
865 sizes are presented in base pairs instead of repeat units because the initial and terminal repeats  
866 are not always full length. C) DNA (top) and amino acid (bottom) sequence logos representing  
867 the exon 6 repeat region found in many *wtf* genes. D) The distribution of exon 6 repeat sizes in  
868 all assembled *wtf* genes.

869

870 **Figure 4: Analysis of selective forces acting on *wtf7*, *wtf11*, *wtf14* and *wtf15* genes.** A)  
871 dN/dS analyses for all pairwise combinations between orthologous genes. The dN/dS ratio is  
872 shown, with the numbers of nonsynonymous and synonymous changes shown as a ratio in  
873 brackets. Alignments highlighting the variant codons are shown in Supplemental Figures 17-20.  
874 B) BUSTED and PAML analyses of alleles from 57 strains. P-values supporting positive  
875 selection are highlighted in bold (see text for details).

876

877 **Table 1: Meiotic double strand break hotspots are enriched near *wtf* genes.**

878

879 **Supplemental Table 1:** The names previously given to each CBS5557 *wtf* gene by Hu et al.  
880 are shown on the left and the names we use in this work are shown on the right.

881

882 **Supplemental Figure 1:** Representative long RNA sequence reads (dark grey) from Kuang et  
883 al. are shown aligned to *Sp wtf* genes (30). The solid lines represent UTRs, boxes are exons  
884 and the thin lines are introns (i.e. they were not found in the reads). The blue gene annotations  
885 are from PomBase. The light grey annotations are based on the long read RNA sequencing  
886 reads. The light grey annotations were used for the coding sequences in this work. Predicted  
887 pseudogenes have an \* after the gene name. On the annotations, the light grey annotations  
888 used in this work, the '\*'s indicate in frame stop codons and the '/'s indicate frameshift  
889 mutations.

890

891 **Supplemental Figure 2:** Insert sizes of mate-pair libraries. Most pairs of reads map as  
892 expected for mate-pair fragments (i.e. the 3' end of the reads point away from each other in the  
893 genome) with insert size ~ 6-10 kb. These were the reads that were useful in identifying and  
894 assembling *wtf* loci. However, the mate-pair library prep is not 100% efficient, and also

895 generates a subset of reads with inserts of < 1 kb that typically map as regular paired-end reads  
896 (i.e. the 3' end of the reads point towards each other in the genome); these reads were  
897 generally discarded by the selective steps of our sequence analysis pipelines (Figure 1A and  
898 1D).

899

900 **Supplemental Figure 3:** The width of the sequence pileups used to identify loci containing *wtf*  
901 genes and to predict the number of *wtf* genes at each locus. The width of both the 5' and 3'  
902 pileups is shown for loci with one, two, or three verified *wtf* genes from *Sp* (blue), *Sk* (red), and  
903 FY29033 (green). In general, the widest pileup at a given locus was used to predict the number  
904 of *wtf* genes when the pileups were asymmetric (e.g. in the loci with three *wtf* genes).

905

906 **Supplemental Figure 4:** DNA sequence read pileups flanking *wtf* loci for atypical loci, showing  
907 representative of the patterns not shown in Figure 1B. In general, the atypical pileup patterns  
908 were caused by Tf transposon insertions in the sequenced strain that were not present in the *Sp*  
909 reference genome to which the reads were aligned. These transposon insertions make the  
910 actual genome from which the reads were derived different from the reference genome and  
911 unique sequences (not transposons) are needed next to a *wtf* locus to form a pileup. The Tf  
912 insertions were discovered during assembly of the loci. Black arrows indicate the locations of *wtf*  
913 genes and green arrows represent Tf transposons.

914

915 **Supplemental Figure 5:** Sequence coverage of the *wtf23* region in FY29030 and the *wtf33*  
916 region in FY28989. We infer from the roughly doubled coverage of those regions that they are  
917 duplicated in those strains. In addition, high sequence identity across the duplicated regions  
918 within each strain are consistent with recent duplications and very little divergence between the  
919 two copies.

920

921 **Supplemental Figure 6:** The *wtf* gene names are shown mapped onto the karyotype of *Sp*,  
922 although not all the strains share this karyotype. Genes on the Watson strand are shown above  
923 each chromosome, whereas genes on the Crick strand are shown below chromosomes.  
924 Experimentally confirmed drivers and genes we predict to be intact drivers are shown in purple  
925 text. Predicted pseudogenes are indicated with an asterisk.

926

927 **Supplemental Figure 7:** Maximum likelihood tree generated by PhyML (executed in Geneious)  
928 including full-length ORF sequences of all *wtf* genes from *Sp*, *Sk*, FY29033 and CBS5557

929 (alignment length 1,465 bp). The tree is unrooted, but is shown with arbitrary rooting in (A) to  
930 facilitate reading the branch labels. Predicted pseudogenes are indicated with an \*. Nodes with  
931  $\geq 95\%$  bootstrap support are indicated with red circles. The same tree is shown unrooted in (B).  
932 The *wtf7* (dark blue), *wtf11* (pink), *wtf14* (brown) and *wtf15* (light blue) clades are each  
933 highlighted. The clade highlighted in green was discussed in the text as an example. The scale  
934 bar indicates nucleotide substitutions per site.

935

936 **Supplemental Figure 8:** GARD analysis of all *wtf* ORF sequences from *Sp*, *Sk*, FY29033 and  
937 CBS5557. This analysis found that a hypothesis allowing multiple trees for different segments of  
938 the alignment is  $>100$  times more likely than a hypothesis allowing only a single tree, supporting  
939 that recombination operates within *wtf* genes. The analysis identified two likely breakpoints  
940 corresponding to positions 615 and 1047 in the alignment, yielding three segments as depicted  
941 by the colored rectangles at the top of the figure. Both breakpoints have strong statistical  
942 support (\*\*\*) ( $p < 0.01$ ). The trees generated for each segment (below) are distinct.

943

944 **Supplemental figure 9:** Maximum likelihood tree for exon 1 of the *wtf* genes (alignment length  
945 150 bp). See legend to Supplemental Figure 7 for details. The grey shaded box corresponds to  
946 the black color coded exon in the cartoons in Figure 2A.

947

948 **Supplemental figure 10:** Maximum likelihood tree for exon 2 of the *wtf* genes (alignment length  
949 381 bp). See legend to Supplemental Figure 7 for details. The grey shaded box corresponds to  
950 the black color coded exon in the cartoons in Figure 2A.

951

952 **Supplemental figure 11:** Maximum likelihood tree for exon 3, excluding repeats, of the *wtf*  
953 genes (alignment length 203 bp). See legend to Supplemental Figure 7 for details. The grey  
954 shaded box corresponds to the black color coded exon in the cartoons in Figure 2A.

955

956 **Supplemental figure 12:** Maximum likelihood tree for exon 4 of the 6-exon *wtf* genes  
957 (alignment length 192 bp). See legend to Supplemental Figure 7 for details. The grey shaded  
958 box corresponds to the black color coded exon in the cartoons in Figure 2A.

959

960 **Supplemental figure 13:** Maximum likelihood tree for exon 5 from the 6-exon *wtf* genes and  
961 the homologous exon 4 of the 5-exon *wtf* genes (alignment length 65 bp). See legend to

962 Supplemental Figure 7 for details. The grey shaded box corresponds to the black color coded  
963 exon in the cartoons in Figure 2A.

964

965 **Supplemental figure 14:** Maximum likelihood tree for exon 6, excluding repeats, from the 6-  
966 exon *wtf* genes and the homologous exon 5 of the 5-exon *wtf* genes (alignment length 69 bp).  
967 See legend to Supplemental Figure 7 for details. The grey shaded box corresponds to the black  
968 color coded exons in the cartoons in Figure 2A.

969

970 **Supplemental figure 15:** Maximum likelihood tree of the region upstream of *wtf* genes  
971 (alignment length 303 bp). See legend to Supplemental Figure 7 for details. The grey shaded  
972 box corresponds to the black color coded region in the cartoons in Figure 2A.

973

974 **Supplemental figure 16:** Maximum likelihood tree for intron 1 of the *wtf* genes (alignment  
975 length 280 bp). See legend to Supplemental Figure 7 for details. The grey shaded box  
976 corresponds to the green color coded intron in the cartoons in Figure 2A.

977

978 **Supplemental Figure 17:** A codon alignment of the *wtf7* orthologs from *Sp*, *Sk*, FY29033 and  
979 CBS5557. Purple boxes represent exons; all DNA and amino acid sequence variants are  
980 highlighted.

981

982 **Supplemental Figure 18:** A codon alignment of the *wtf11* orthologs from *Sp*, *Sk*, FY29033 and  
983 CBS5557 is shown. Purple boxes represent exons; all DNA and amino acid sequence variants  
984 are highlighted.

985

986 **Supplemental Figure 19:** A codon alignment of the *wtf14* orthologs from *Sp*, *Sk*, FY29033 and  
987 CBS5557 is shown. Purple boxes represent exons; all DNA and amino acid sequence variants  
988 are highlighted.

989

990 **Supplemental Figure 20:** A codon alignment of the *wtf15* orthologs from *Sp*, *Sk*, FY29033 and  
991 CBS5557 is shown. Purple boxes represent exons; all DNA and amino acid sequence variants  
992 are highlighted.

## Figure 1

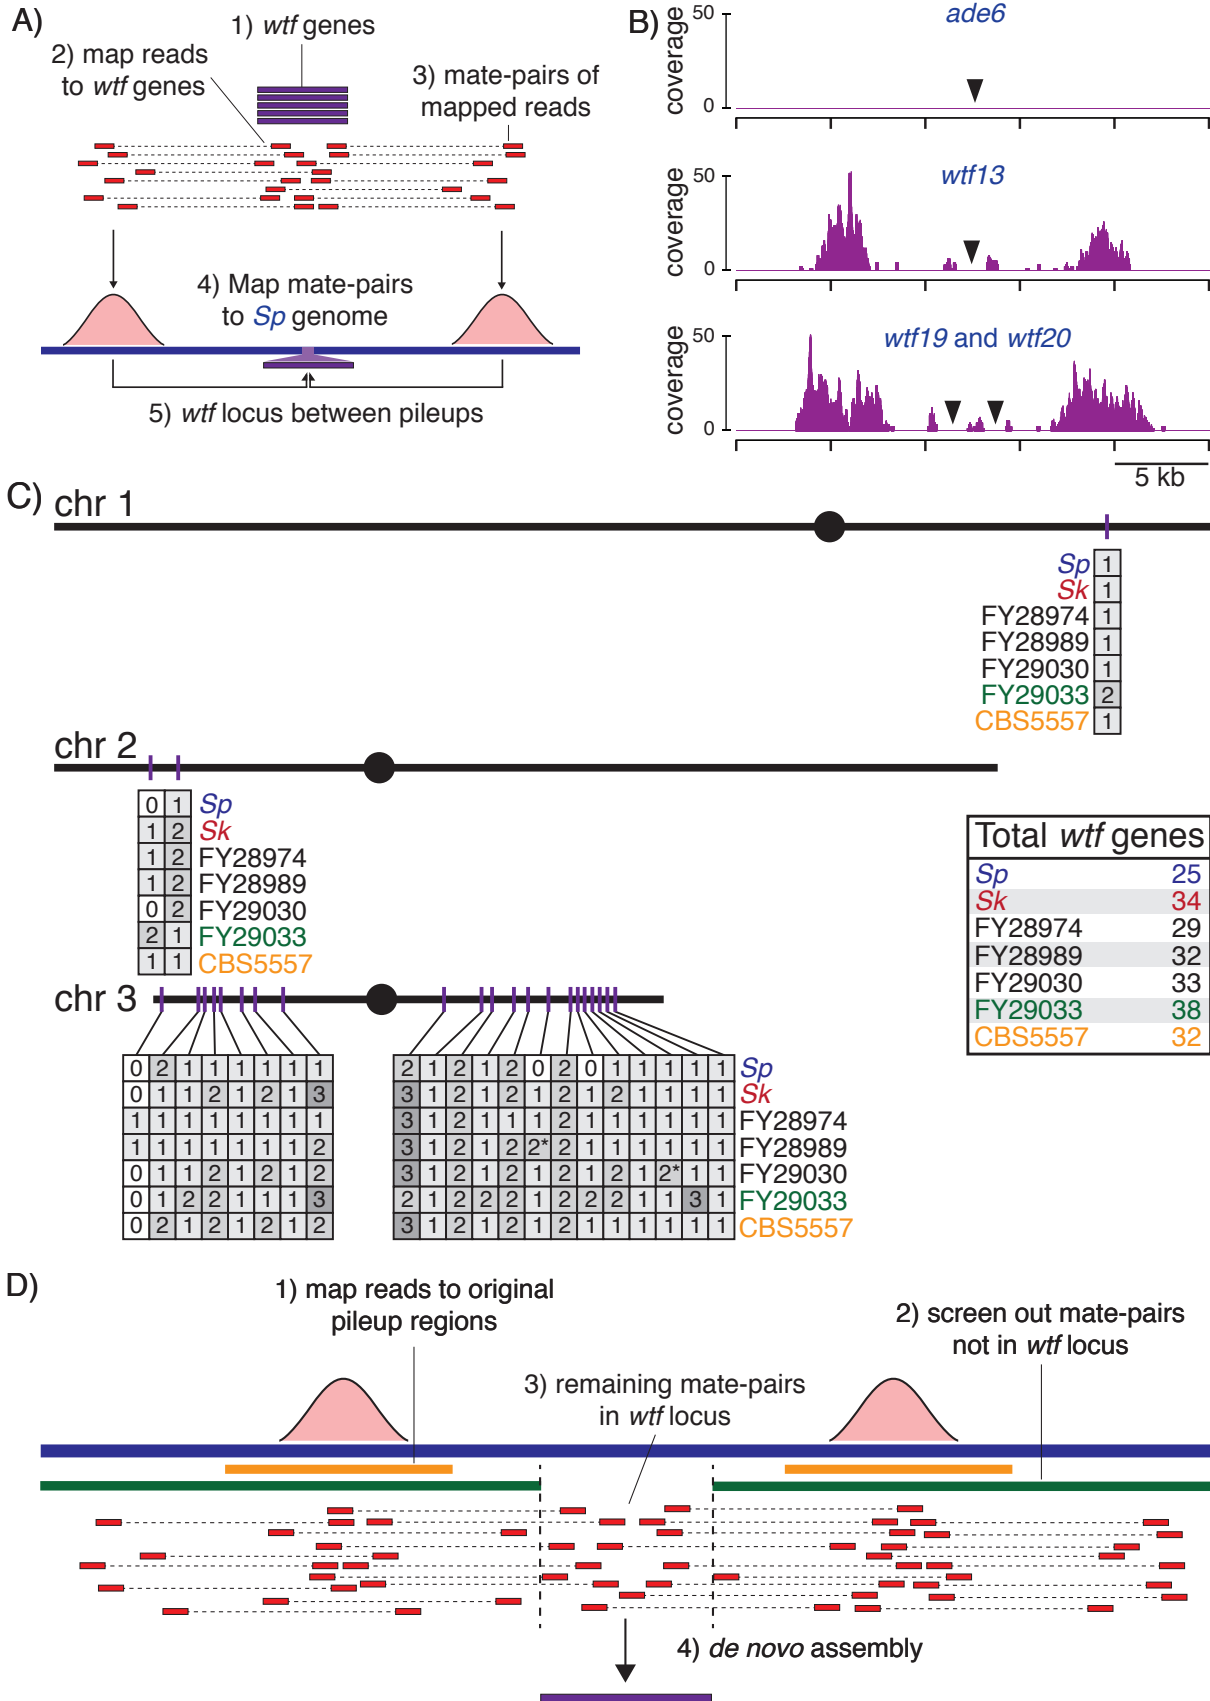

## Figure 2

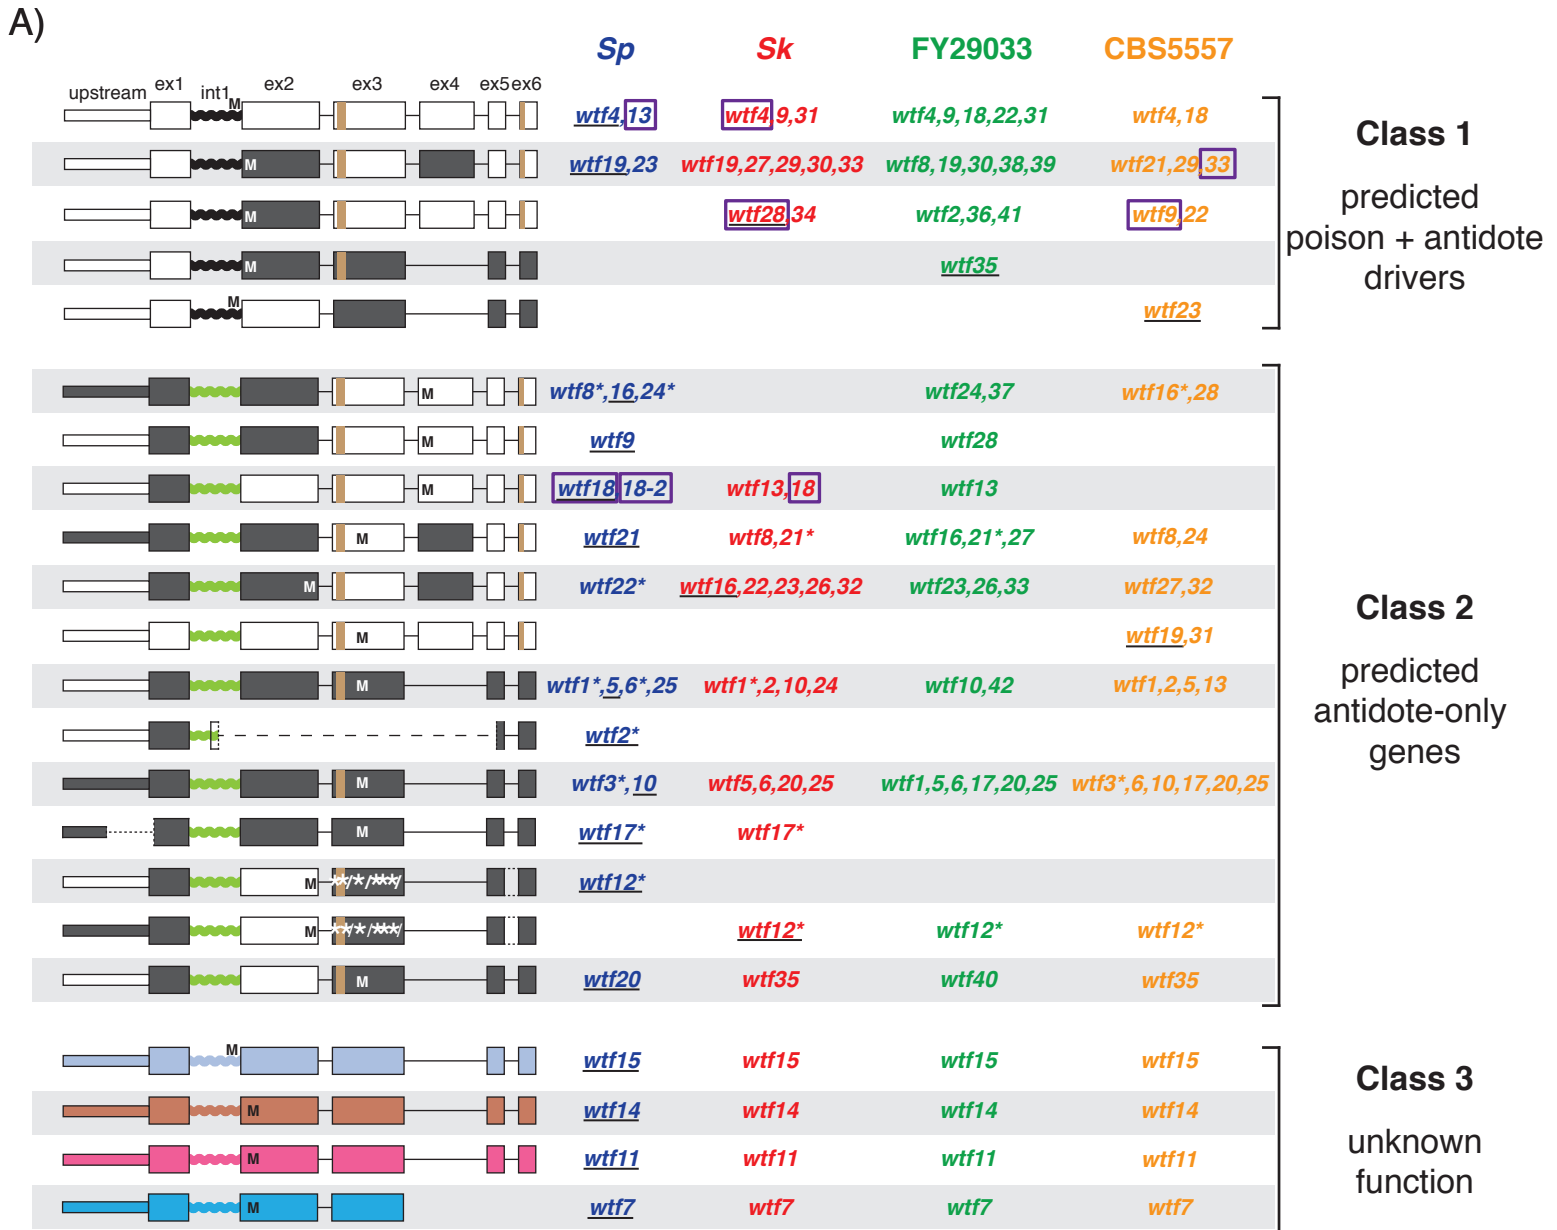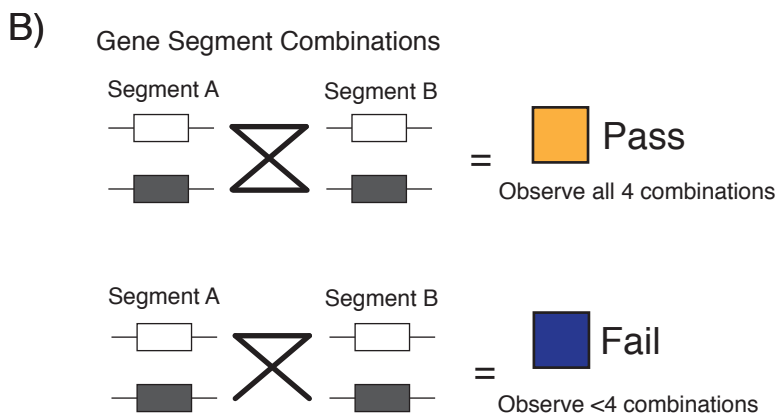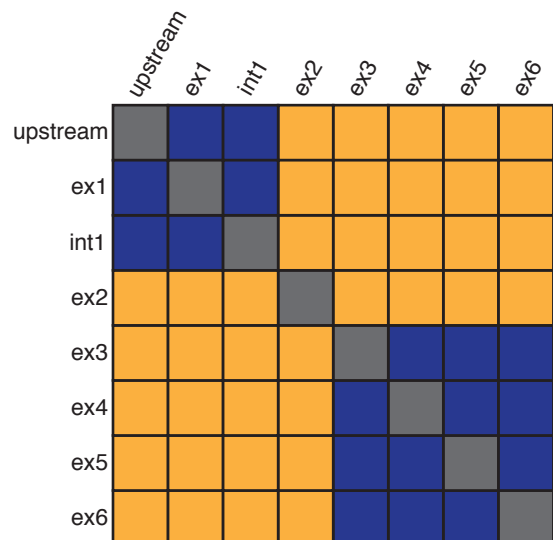



## Figure 3

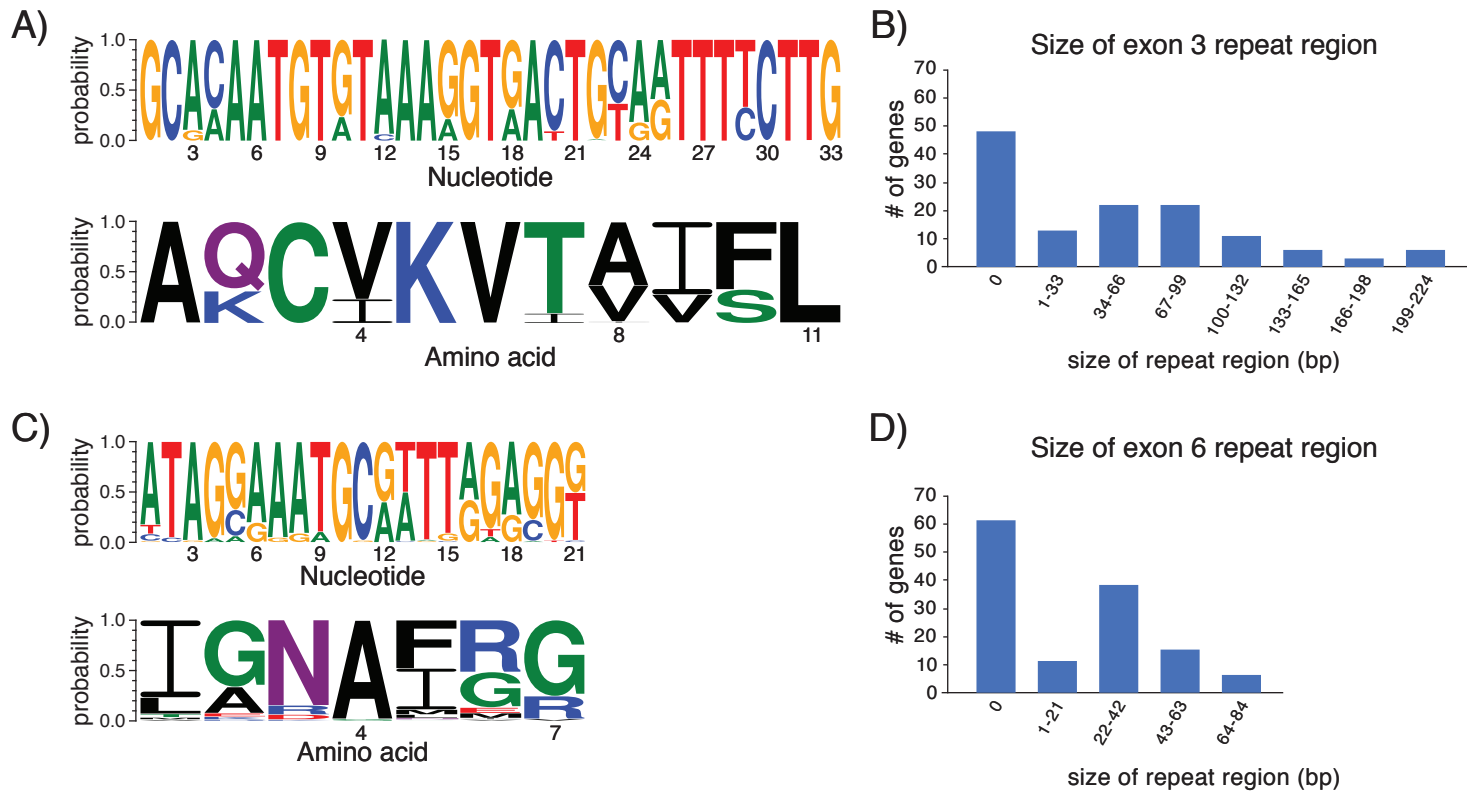

## Figure 4

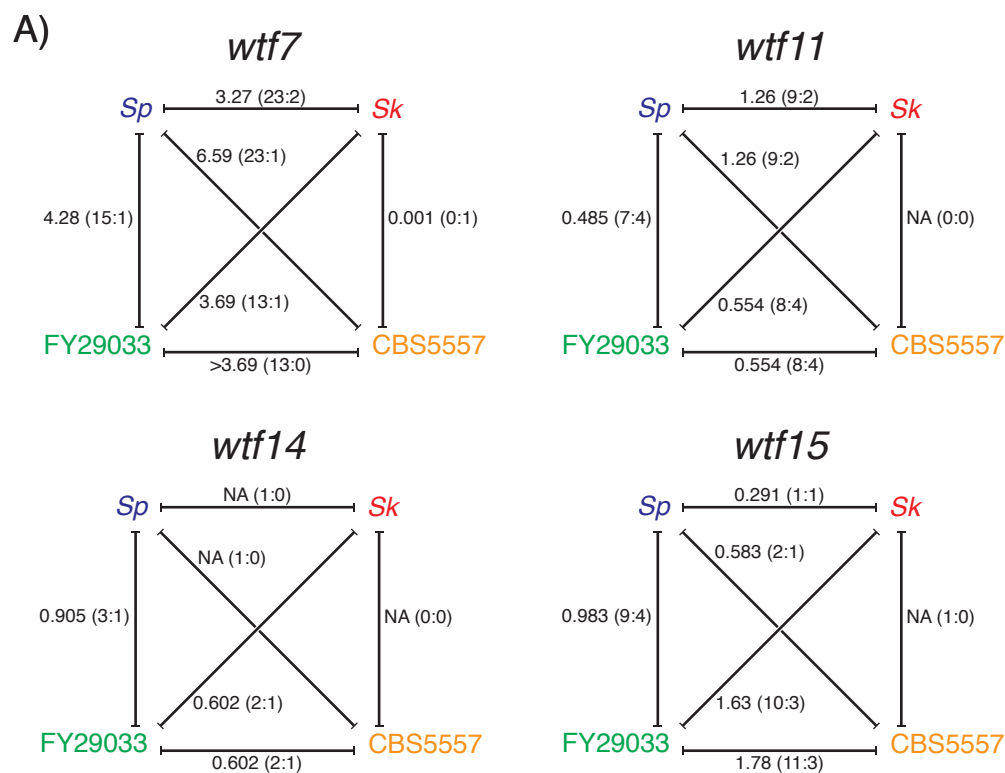

B)

| gene         | num. unique sequences | BUSTED $p$ -value | M8 vs. M7 $-2x\Delta\ln L$ | M8 vs. M7 $p$ -value | M8 vs. M8a $-2x\Delta\ln L$ | M8 vs. M8a $p$ -value | % sites with $dN/dS > 1$ (avg. $dN/dS$ ) | sites with $dN/dS > 1$ (M8 BEB $> 0.95$ ) |
|--------------|-----------------------|-------------------|----------------------------|----------------------|-----------------------------|-----------------------|------------------------------------------|-------------------------------------------|
| <i>wtf7</i>  | 9                     | <b>&lt;0.001</b>  | 14.7                       | <b>0.00064</b>       | 14.1                        | <b>0.00017</b>        | 7% (22.5)                                | 125V,188D,192G,196L,214N                  |
| <i>wtf11</i> | 14                    | 1.00              | 8.4                        | <b>0.015</b>         | 8.3                         | <b>0.0039</b>         | 15% (6.0)                                | 156S                                      |
| <i>wtf14</i> | 8                     | 0.97              | 3.3                        | 0.20                 | 3.3                         | 0.07                  | -                                        | -                                         |
| <i>wtf15</i> | 10                    | 0.79              | 0.4                        | 0.81                 | 0.4                         | 0.51                  | -                                        | -                                         |
